# Supplementary material
Source: PubMed Central journal article supplement (PMC1150830)
Supplement: pnas_0501886102_3.pdf [file pnas_0501886102_3.pdf]

**A**

Cells are precytokinesis when  
VSG knockdown is sensed

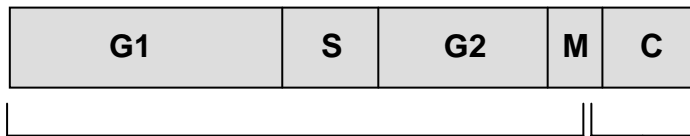

no cytokinesis  
2K2N block  
2 external flagella  
1 old and 1 new

**B**

Cells are committed  
to cytokinesis

cytokinesis  
occurs

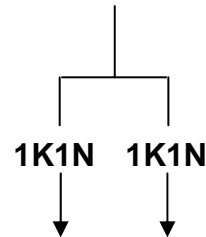

2K2N block at the end of  
the next cell cycle.  
1 external old flagellum  
1 internal new flagellum

**Fig. 9**
