# Supplementary material
Source: PubMed Central journal article supplement (PMC1150830)

**A**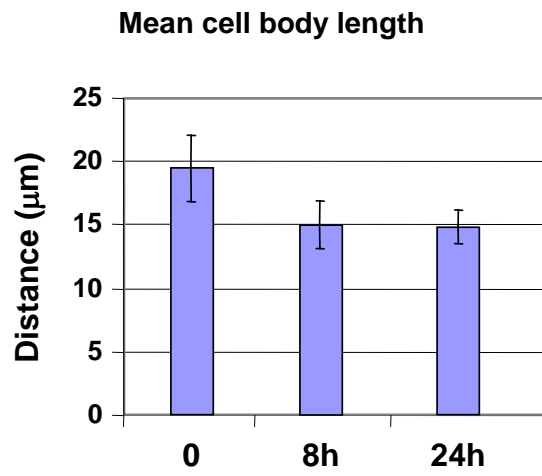**B**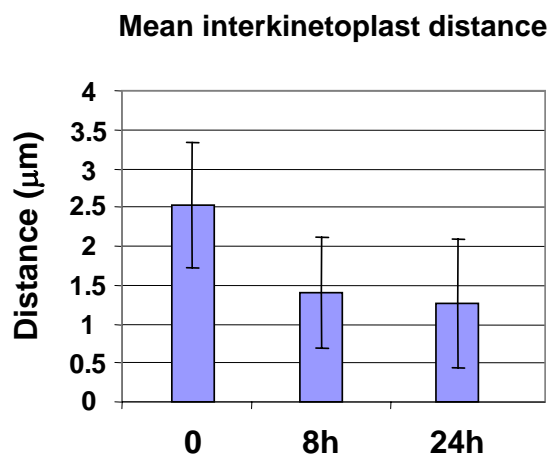**C**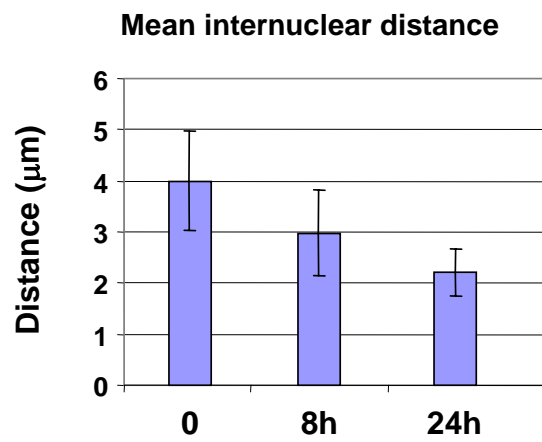**Fig. 7**

Supplement: pnas_0501886102_1.pdf [file pnas_0501886102_1.pdf]

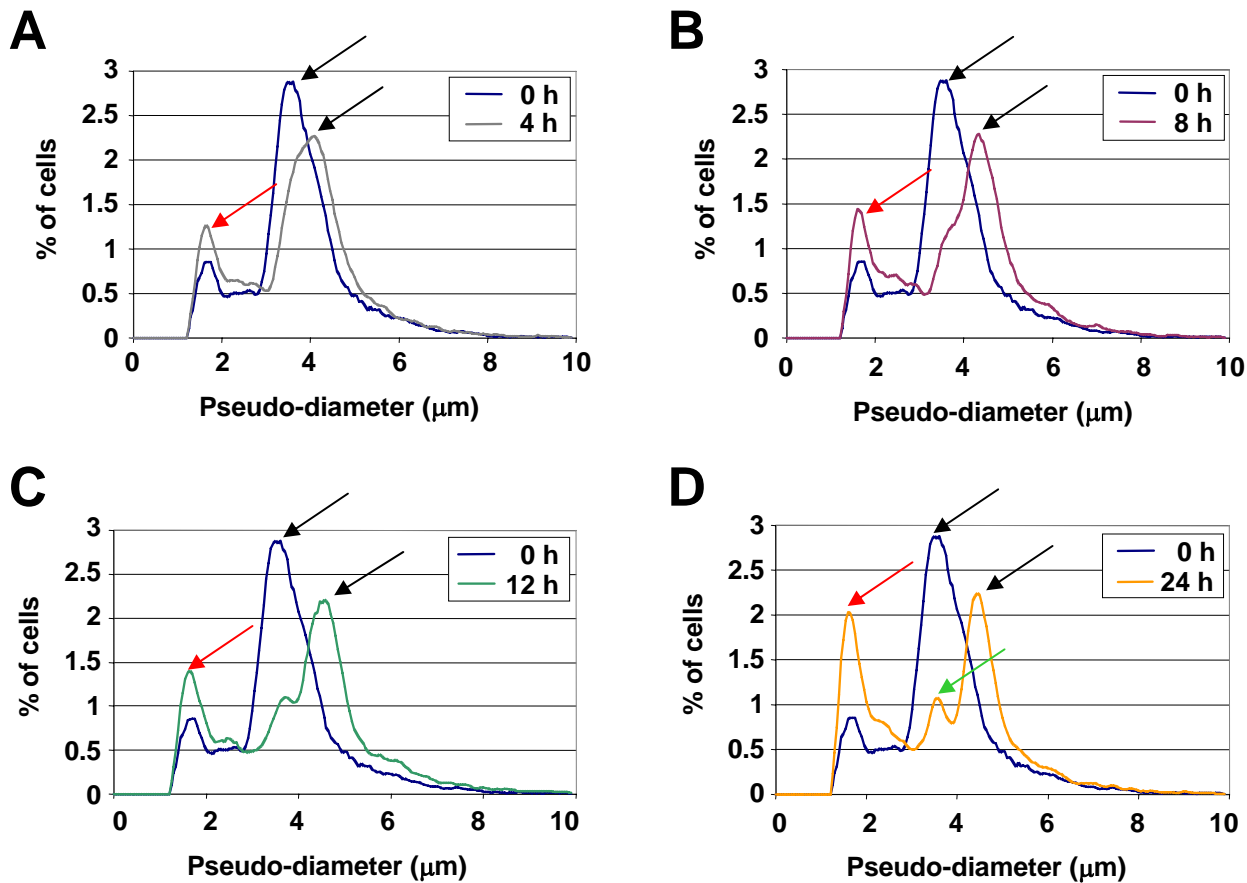

| Time induction (h) | Pseudo-diameter ( $\mu\text{m}$ ) | Volume ( $\mu\text{m}^3$ ) | Volume increase (%) |
|--------------------|-----------------------------------|----------------------------|---------------------|
| 0                  | 3.60                              | 24                         | -                   |
| 4                  | 4.10                              | 36                         | 50                  |
| 8                  | 4.35                              | 43                         | 79                  |
| 12                 | 4.55                              | 49                         | 104                 |
| 24                 | 4.45                              | 46                         | 92                  |

**Fig. 8**

Supplement: pnas_0501886102_2.pdf [file pnas_0501886102_2.pdf]
